# Supplementary material for: Spectroscopically enhanced far-red phosphor Li2Mg3TiO6:Cr3+ and its application prospects to the cold resistance of rice
Source: Royal Society of Chemistry journal article supplement (doi:10.1039/d3ma00654a), 2023-01-01
Supplement: d3ma00654a1.pdf [file d3ma00654a1.pdf]

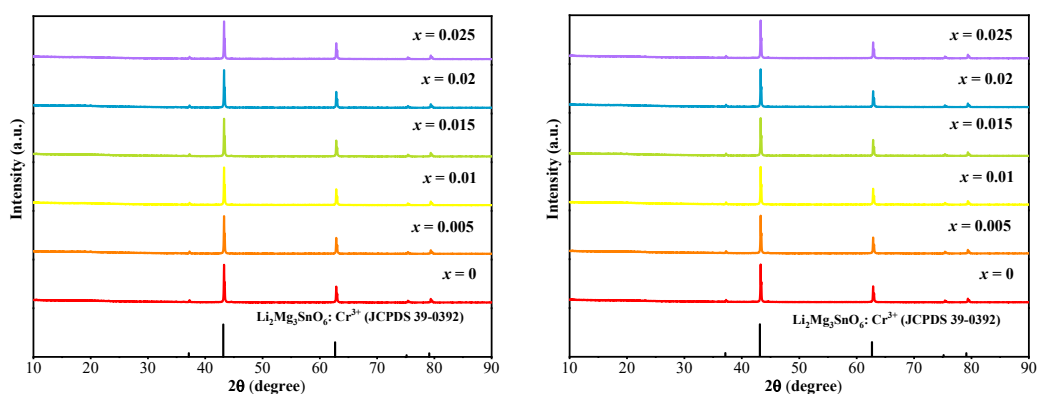

Fig. S1. XRD patterns of LMTAO:  $x\text{Cr}^{3+}$  and LMTGO:  $x\text{Cr}^{3+}$

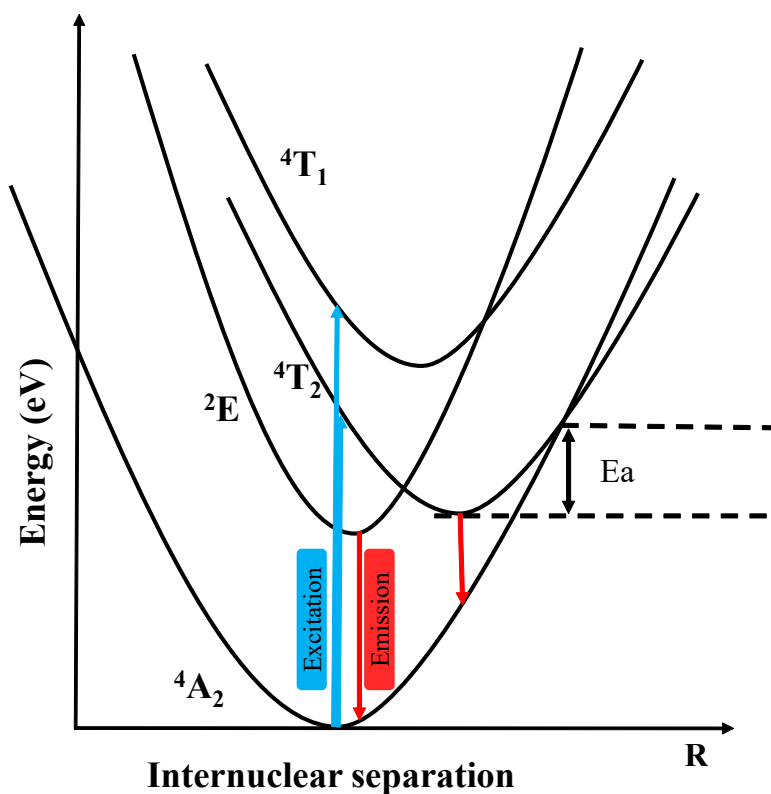

Fig. S2. The configurational coordinate diagram for  $\text{Cr}^{3+}$  ions in  $\text{Li}_2\text{Mg}_3\text{TiO}_6 \cdot \text{Cr}^{3+}$  phosphors.
